# Supplementary material for: Sm16, ASchistosoma mansoniImmunomodulatory Protein, Fails to Elicit a Protective Immune Response and Does Not Have an Essential Role in Parasite Survival in the Definitive Host
Source: Hindawi journal article supplement (doi:10.1155/2019/6793596), 2019-12-01
Supplement: f1 [file 6793596.f1.pdf]

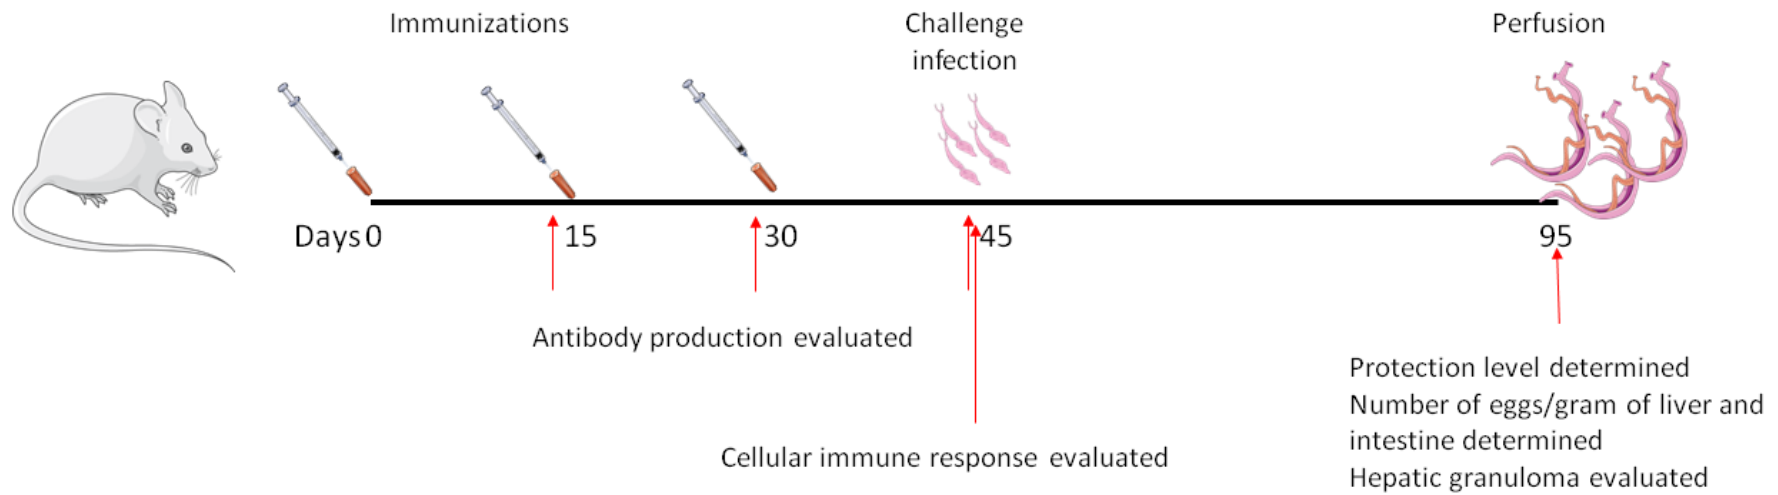

Designed with help of <https://smart.servier.com/>

**Supplementary Figure 1: Immunization protocol.**

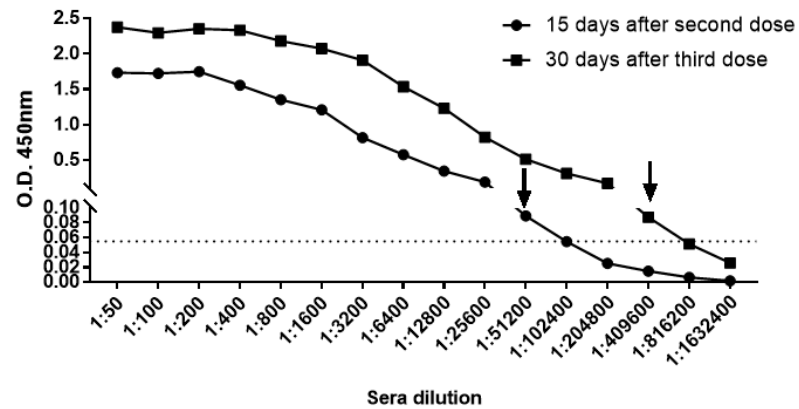

**Supplementary Figure 2. Sm16-specific antibodies titer endpoints in immunized mice serum.** Pools of sera from mice immunized with rSm16 plus Freund's adjuvant obtained 15 days after the second dose (black circles) or 30 days after the third dose (black square) were serially diluted, beginning at 1:50, and used in an ELISA assay. The threshold was calculated using the mean absorbance value of the blank wells plus two standard deviations. The arrows indicate antibodies titer endpoints observed after two and three immunization doses.
